# Supplementary material for: Epigallocatechin-3-Gallate Alleviates Liver Oxidative Damage Caused by Iron Overload in Mice through Inhibiting Ferroptosis
Source: MDPI journal article supplement (doi:10.3390/nu15081993), 2023-04-21
Supplement: s1 [file s1]

## Supplementary 1

The in vitro experiment results showed that iron overload significantly reduced cell viability, while EGCG could recover it. As important indicators of ferroptosis, the levels of  $\text{Fe}^{2+}$ , ROS, and C11-BODIPY were significantly increased under iron overload, while EGCG significantly decreased the C11-BODIPY level under FAC treatment. In addition, we used RSL3 to induce ferroptosis and found that both 50 and 100  $\mu\text{M}$  of EGCG could significantly reduce the C11-BODIPY level. In vitro experiments also proved that EGCG could alleviate iron overload and RSL3-induced ferroptosis.

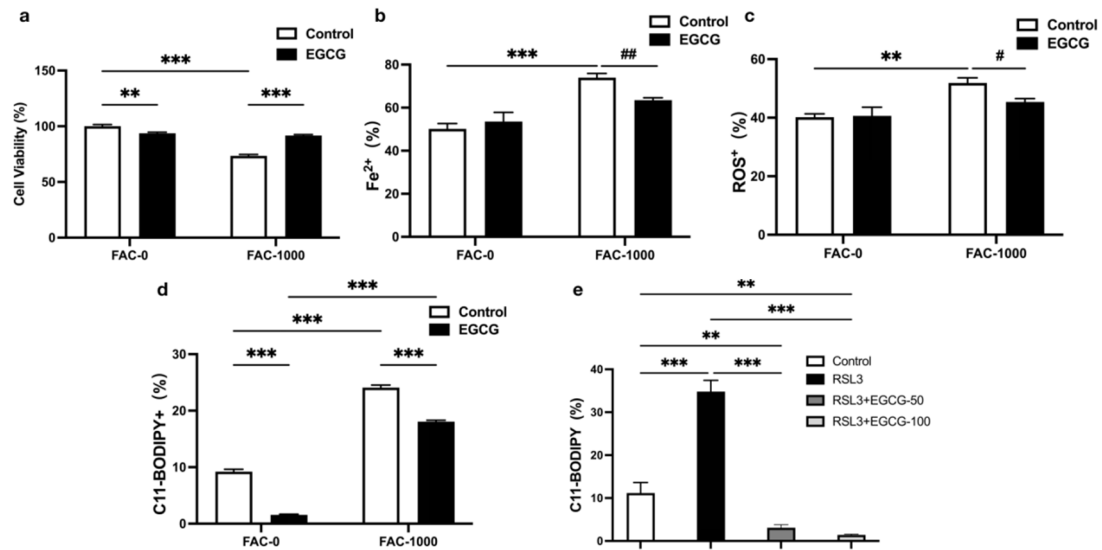

Figure S1. Iron overload induces ferroptosis, resulting in hepatocyte injury. (a–d) Cell viability, ferrous, ROS and C11-BODIPY level in the cells treated with FAC (n = 6) (Two-way ANOVA,  $p < 0.05$  (\*),  $p < 0.01$  (\*\*),  $p < 0.001$  (\*\*\*)). *t*-test:  $p < 0.05$  (#),  $p < 0.01$  (##)). (e) C11-BODIPY level in cells with RSL3 (n = 3) (One-way ANOVA,  $p < 0.05$  (\*),  $p < 0.01$  (\*\*),  $p < 0.001$  (\*\*\*)).
